# Supplementary material for: Flower ball cathode assembled from Cu doped Co3S4/Ni3S2 ultrathin nanosheets in a photocatalytic fuel cell for efficient photoelectrochemical rifampicin purification and simultaneous electricity generation based on a CuO QDs/TiO2/WO3 photoanode
Source: Royal Society of Chemistry journal article supplement (doi:10.1039/d3ra02502k), 2023-01-01
Supplement: d3ra02502k1.pdf [file d3ra02502k1.pdf]

## Supporting Information

**Flower balls cathode assembled by Cu doped Co<sub>3</sub>S<sub>4</sub>/Ni<sub>3</sub>S<sub>2</sub> ultrathin nanosheets in photocatalytic fuel cell for efficient photoelectrochemical rifampicin purification and simultaneous electricity generation based on CuO QDs/TiO<sub>2</sub>/WO<sub>3</sub> photoanode**

Yuling Wang<sup>a,b</sup>, Xiaolong Li<sup>a,b</sup>, Yankun Fan<sup>a,b</sup>, Jun Wu<sup>a,b</sup>, Xin Wu<sup>a,b</sup>, Ligang Xia<sup>a,b,c\*</sup>,  
Weifeng Yao<sup>a,b,c</sup>, Qiang Wu<sup>a,b,c</sup>, Yulin Min<sup>a,b,c</sup>, Qunjie Xu<sup>a,b,c\*</sup>

<sup>a</sup> *Shanghai Key Laboratory of Materials Protection and Advanced Materials in Electric Power, Shanghai Engineering Research Center of Energy-Saving in Heat Exchange Systems, Shanghai University of Electric Power, Shanghai 200090, China*

<sup>b</sup> *College of Environmental and Chemical Engineering, Shanghai University of Electric Power, No.2588 Changyang Road, Shanghai, 200090, PR China*

<sup>c</sup> *Shanghai Institute of Pollution Control and Ecological Security, Shanghai, PR China*

---

\* Corresponding authors:  
E-mail: [xialg82@shiep.edu.cn](mailto:xialg82@shiep.edu.cn) (L. Xia), [xuqunjie@shiep.edu.cn](mailto:xuqunjie@shiep.edu.cn) (Q. Xu)

## Experimental Section

**Synthesis of WO<sub>3</sub> photoanode:** Firstly, F-doped SnO<sub>2</sub> conductive glass (FTO) substrate was pre-treated with acetone, ethanol and deionized water successively. 1.4 mmol of Na<sub>2</sub>WO<sub>4</sub> and 1.2 mmol of (NH<sub>4</sub>)<sub>2</sub>C<sub>2</sub>O<sub>4</sub> were mixed in 33 mL of deionized water. Then, 9ml HCl (37%) were added to the solution and vigorously stirred to make the solution yellow. Then 8 mL H<sub>2</sub>O<sub>2</sub> (30%) was added and stirred for 10min to make the solution clear. Finally, 30 mL of ethanol was added into the solution. The FTO was immersed into a beaker containing the above solution with the conductive surface facing down. Then placed the sealed beaker in an electric blast drying oven at 85°C for 3 h. After cooling to room temperature, the WO<sub>3</sub> was washed with deionized water and annealed at 500°C for 2 h.

**Synthesis of TiO<sub>2</sub>/WO<sub>3</sub> photoanode:** 0.9 mmol of H<sub>8</sub>F<sub>6</sub>N<sub>2</sub>Ti and 4.5 mmol of H<sub>3</sub>BO<sub>3</sub> were mixed in 60 mL of deionized water. Then the prepared WO<sub>3</sub> photoanode was immersed into the beaker containing the above solution with the WO<sub>3</sub> side facing down. The sealed beaker was placed in a water bath at 25 °C for 60 h to prepare WO<sub>3</sub>/TiO<sub>2</sub> photoanode. Finally, washed the photoanode with deionized water and dried.

**Synthesis of CuO QDs/TiO<sub>2</sub>/WO<sub>3</sub> photoanode:** 0.5 mmol of CuSO<sub>4</sub>·5H<sub>2</sub>O was first dissolved into 20 mL of deionized water, and 2.5mmol of Na<sub>2</sub>S<sub>2</sub>O<sub>3</sub> was added into the above solution and stirred evenly. The solution gradually changed from blue to colorless and transparent, and the Cu<sup>+</sup> precursor was made. Immersed the WO<sub>3</sub>/TiO<sub>2</sub> photoanode in the prepared solution, and added a drop of 0.5 M NaOH solution to convert Cu<sup>+</sup> into CuOH precipitation. After shaking the beaker for 10 s, the electrode was removed and washed with deionized water. Subsequently, CuOH on the electrode surface was oxidized to CuO by cyclic voltammetry. Finally, washed the photoanode with deionized water and dried. In addition, the effects of CuO modification on the PEC properties of WO<sub>3</sub>/TiO<sub>2</sub> were investigated by preparing different concentrations of Cu<sup>+</sup> precursors.

**Synthesis of CuO QDs/TiO<sub>2</sub>/WO<sub>3</sub>-buried junction silicon (BJS) photoanode:** The

as-prepared CuO QDs/TiO<sub>2</sub>/WO<sub>3</sub> was connected with the rear BJS through copper wire and silver glue.<sup>1</sup>

**Synthesis of Cu doped Co<sub>3</sub>S<sub>4</sub>/Ni<sub>3</sub>S<sub>2</sub> cathode:** The nickel foam was first cut into 25 mm×50 mm in size, and then sonicated for 10 min in 1 mol/L of H<sub>2</sub>SO<sub>4</sub> solution, ethanol, deionized water, respectively. The cathodes were prepared through simple hydrothermal method. Typically, 1 mmol of CoCl<sub>2</sub>·6H<sub>2</sub>O and 2 mmol of Na<sub>2</sub>S<sub>2</sub>O<sub>3</sub> were mixed with 40 mL of deionized water. Then, certain amount of CuCl<sub>2</sub>·2H<sub>2</sub>O were dissolved in the solution. After stirring for 20 min, the mixture was transferred to polytetrafluoroethylene reactor. At the same time, the pretreated nickel foam was immersed into the reactor and heated at 180 °C for 12 h. After cooling to room temperature, the prepared cathode was washed with ethanol and deionized water for several times, and dried at 60 °C under vacuum. In the following, for the convenience of description, Cu doped Co<sub>3</sub>S<sub>4</sub>/Ni<sub>3</sub>S<sub>2</sub> cathodes are all marked as Cu/Co<sub>3</sub>S<sub>4</sub>/Ni<sub>3</sub>S<sub>2</sub>.

**Synthesis of Co<sub>3</sub>S<sub>4</sub>/Ni<sub>3</sub>S<sub>2</sub> cathode:** Preparation of Co<sub>3</sub>S<sub>4</sub>/Ni<sub>3</sub>S<sub>2</sub> cathode followed identical steps as the Cu doped Co<sub>3</sub>S<sub>4</sub>/Ni<sub>3</sub>S<sub>2</sub> cathode except for only adding 1 mmol of CoCl<sub>2</sub>·6H<sub>2</sub>O and 2 mmol of Na<sub>2</sub>S<sub>2</sub>O<sub>3</sub> to form a mixed solution.

**Synthesis of Ni<sub>3</sub>S<sub>2</sub> cathode:** Preparation of Ni<sub>3</sub>S<sub>2</sub> cathode followed identical steps as the Co<sub>3</sub>S<sub>4</sub>/Ni<sub>3</sub>S<sub>2</sub> cathode except for only adding 2 mmol of Na<sub>2</sub>S<sub>2</sub>O<sub>3</sub> to form a mixed solution.

## Supplementary figures

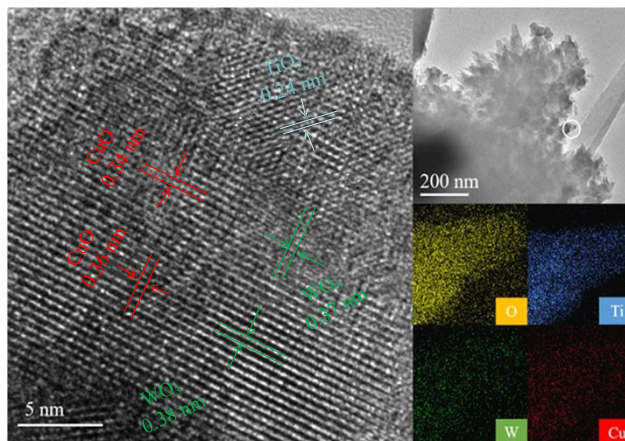

Fig. S1. TEM and EDS mapping images of CuO QDs/TiO<sub>2</sub>/WO<sub>3</sub> photoanode.

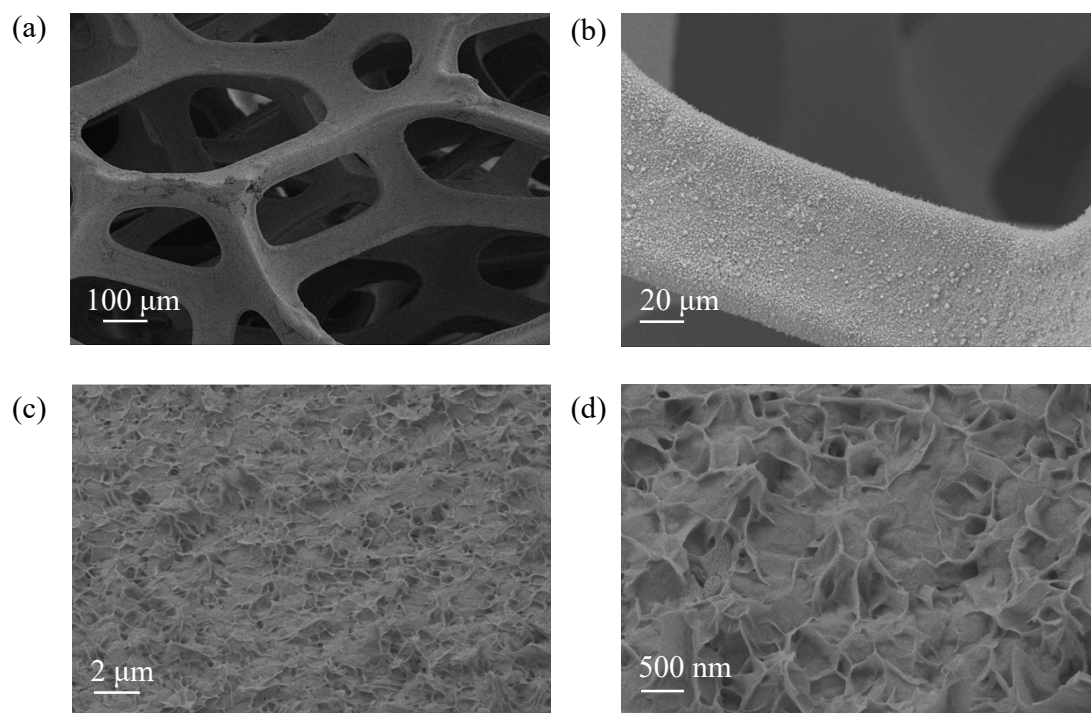

Fig. S2. (a) SEM images of pretreated Ni foam and (b-d) Ni<sub>3</sub>S<sub>2</sub>.

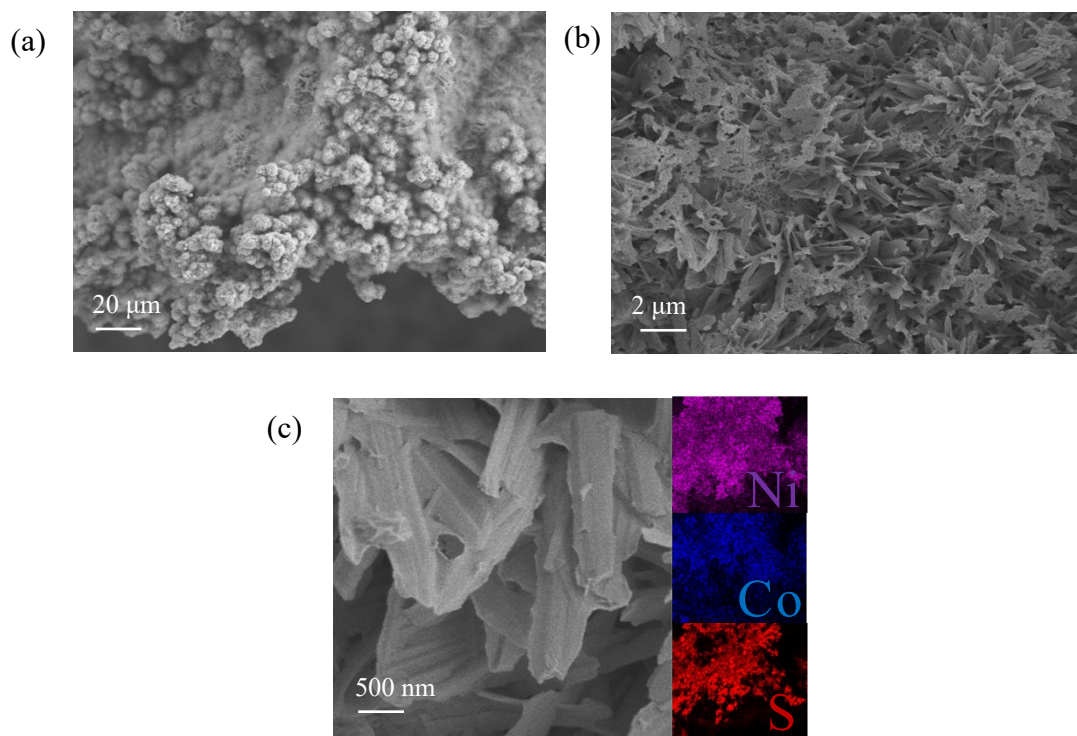

Fig. S3. SEM images of  $\text{Co}_3\text{S}_4/\text{Ni}_3\text{S}_2$  (insert: EDS mapping images of  $\text{Co}_3\text{S}_4/\text{Ni}_3\text{S}_2$ )

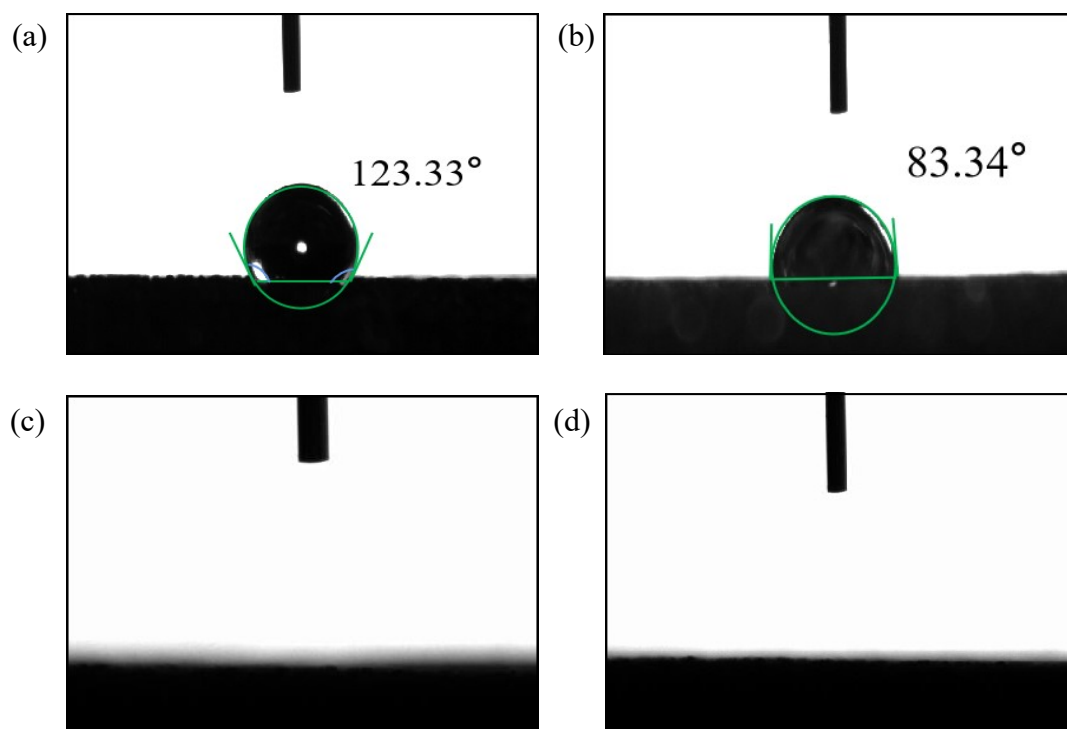

Fig. S4. Contact angle measurements of (a) Ni foam, (b)  $\text{Ni}_3\text{S}_2$ , (c)  $\text{Co}_3\text{S}_4/\text{Ni}_3\text{S}_2$  and (d)

$\text{Cu}/\text{Co}_3\text{S}_4/\text{Ni}_3\text{S}_2$ .

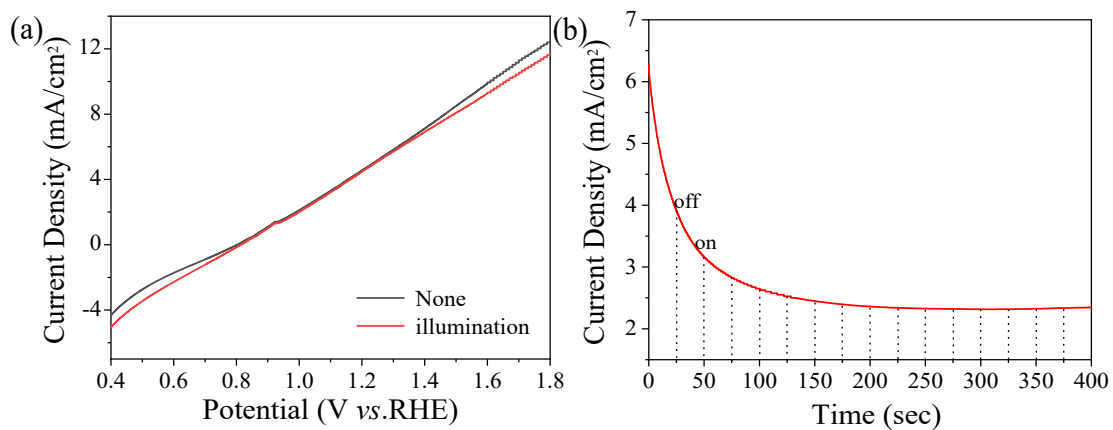

Fig. S5. (a) LSV curves of Cu/Co<sub>3</sub>S<sub>4</sub>/Ni<sub>3</sub>S<sub>2</sub> cathode under different conditions. (b)

Chopping photocurrent–time (J-t) plot of the Cu/Co<sub>3</sub>S<sub>4</sub>/Ni<sub>3</sub>S<sub>2</sub> cathode (dashed line:

switch on and off the simulated light source every 25 seconds).

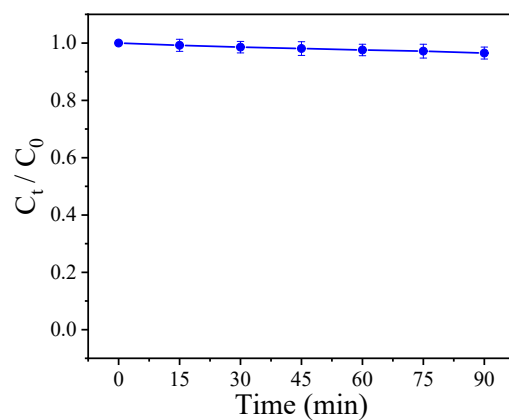

Fig. S6. Self-degradation of RFP under simulated sunlight in PFC system.

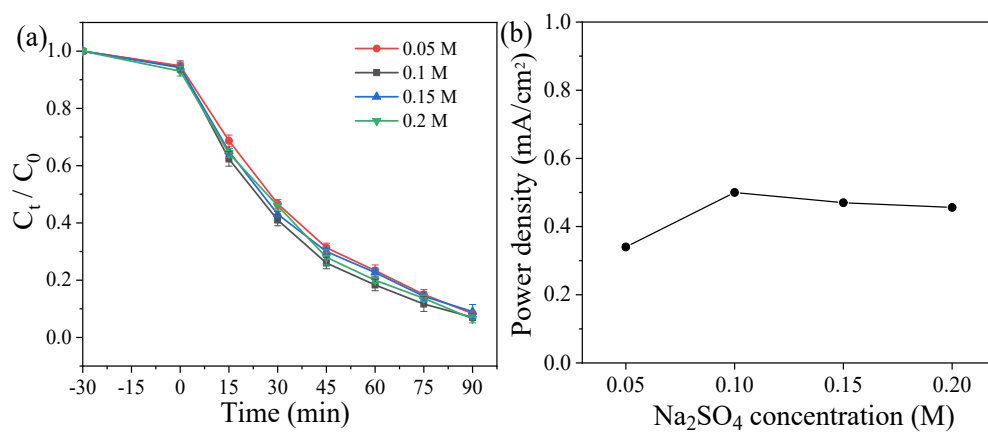

Fig. S7. (a) Degradation of 20 mg L<sup>-1</sup> RFP in PFC systems with different concentrations of SO<sub>4</sub><sup>2-</sup>. (b) Maximum power density (P<sub>max</sub>) in different Na<sub>2</sub>SO<sub>4</sub> concentrations.

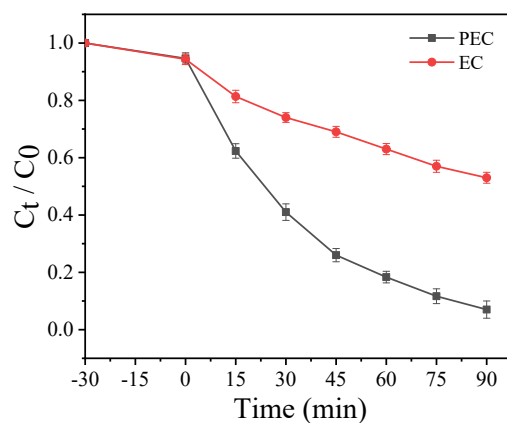

Fig. S8. RFP degradation curves in EC and PFC system.

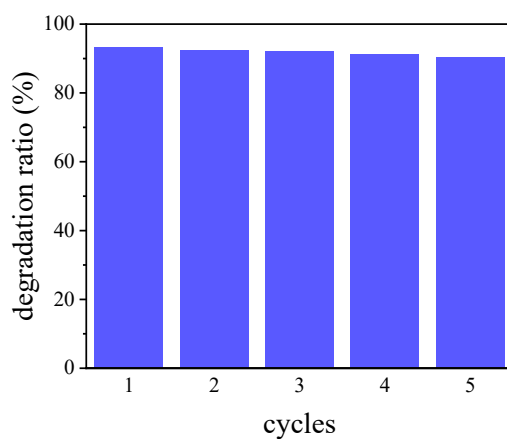

Fig. S9. Cyclic stability test for Cu/Co<sub>3</sub>S<sub>4</sub>/Ni<sub>3</sub>S<sub>2</sub> cathode.

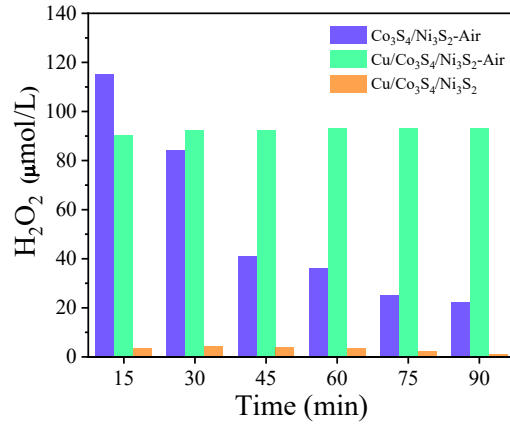

Fig. S10. Concentration of H<sub>2</sub>O<sub>2</sub> in different systems.

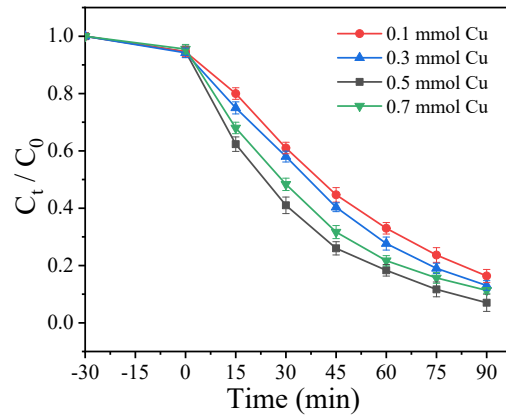

Fig. S11. Degradation performance of Cu/Co<sub>3</sub>S<sub>4</sub>/Ni<sub>3</sub>S<sub>2</sub> electrodes with different copper content.



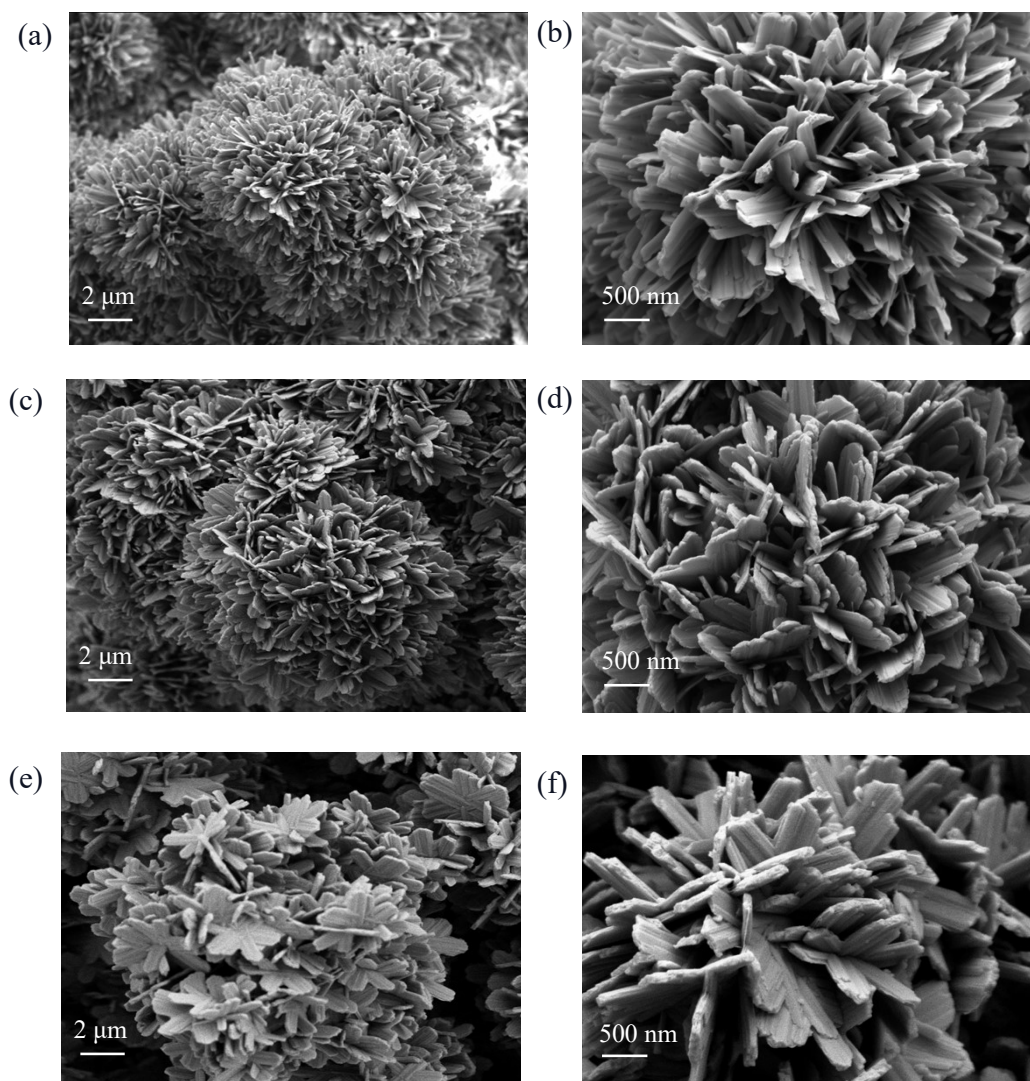

Fig. S12. SEM images of Cu/Co<sub>3</sub>S<sub>4</sub>/Ni<sub>3</sub>S<sub>2</sub> with different Cu doping level (a-b) 0.1 mmol, (c-d) 0.3 mmol, (e-f) 0.7 mmol.

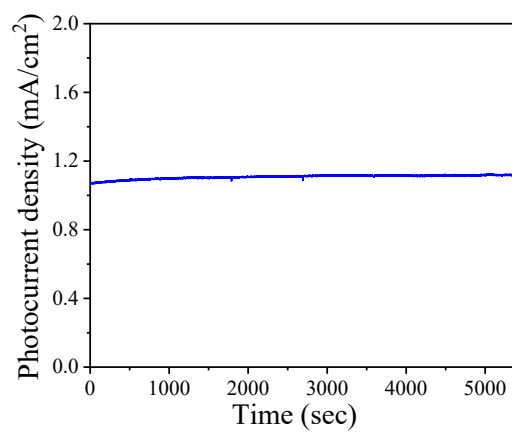

Fig. S13. J-t curve of Cu/Co<sub>3</sub>S<sub>4</sub>/Ni<sub>3</sub>S<sub>2</sub> PEC system in degrading 20 mg L<sup>-1</sup> RFP.

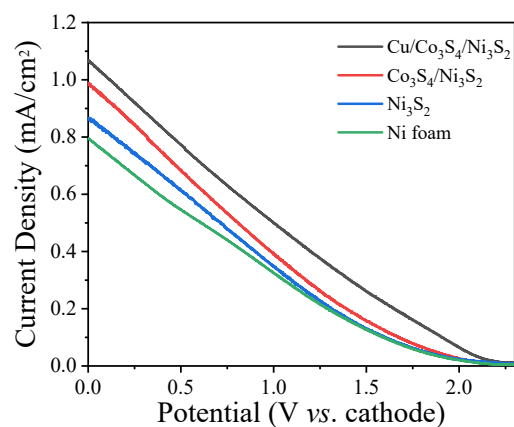

Fig. S14. J-v curves of different PFC system.

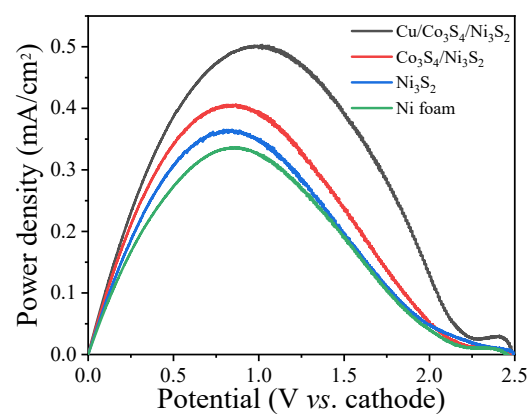

Fig. S15. Power output curves of PFC system with different cathodes.

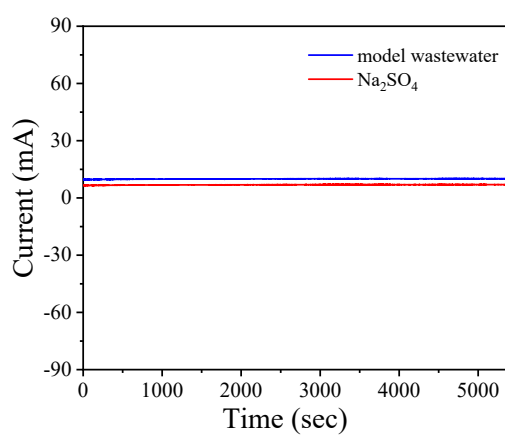

Fig. S16. J-t curves of Cu/Co<sub>3</sub>S<sub>4</sub>/Ni<sub>3</sub>S<sub>2</sub> PEC system in simulated wastewater and 0.1M Na<sub>2</sub>SO<sub>4</sub> solution.

Table S1. Cell parameters of Co<sub>3</sub>S<sub>4</sub> and Ni<sub>3</sub>S<sub>2</sub>.

| substance                      | Formula                                                            | cell parameters<br>(Co <sub>3</sub> S <sub>4</sub> /Ni <sub>3</sub> S <sub>2</sub> .) | cell parameters<br>(Cu/Co <sub>3</sub> S <sub>4</sub> /Ni <sub>3</sub> S <sub>2</sub> .) |
|--------------------------------|--------------------------------------------------------------------|---------------------------------------------------------------------------------------|------------------------------------------------------------------------------------------|
| Co <sub>3</sub> S <sub>4</sub> | $\frac{1}{d^2} = \frac{h^2 + k^2 + l^2}{a^2}$                      | a=b=c=9.392 Å,<br>α=β=γ=90°                                                           | a=b=c=9.394 Å,<br>α=β=γ=90°                                                              |
| Ni <sub>3</sub> S <sub>2</sub> | $\frac{1}{d^2} = \frac{4(h^2 + hk + k^2)}{3a^2} + \frac{l^2}{c^2}$ | a=b=5.738 Å,<br>c=7.136 Å,<br>α=β=90°, γ=120°                                         | a=b=5.738 Å,<br>c=7.136 Å,<br>α=β=90°, γ=120°                                            |

Table S2. Comparison with reported PFC systems in electric production and pollutant degradation.

| photoanode                                                     | (photo)<br>cathode                                                   | Pollutant<br>substrate | J <sub>sc</sub><br>(mA·cm <sup>-2</sup> ) | V <sub>oc</sub><br>(V) | P <sub>max</sub><br>(mW·cm <sup>-2</sup> ) | Degradation<br>eff./time<br>taken | Ref.         |
|----------------------------------------------------------------|----------------------------------------------------------------------|------------------------|-------------------------------------------|------------------------|--------------------------------------------|-----------------------------------|--------------|
| BiVO <sub>4</sub> /WO <sub>3</sub> /W                          | Pt                                                                   | Tetracycline           | 0.26                                      | 0.78                   | 0.20                                       | 78%/4 h                           | S2           |
| TiO <sub>2</sub> /Ti                                           | Cu <sub>2</sub> O/Cu                                                 | Methylene blue         | 0.17                                      | 0.62                   | 0.25                                       | 88%/8 h                           | S3           |
| TiO <sub>2</sub> /WO <sub>3</sub> /W                           | Pt/BJS                                                               | Tetracycline           | 0.38                                      | 0.77                   | 0.06                                       | 92%/3 h                           | S4           |
| TiO <sub>2</sub> /BiVO <sub>4</sub>                            | Pt                                                                   | Rhodamine B            | 0.29                                      | 0.34                   | 0.002                                      | 30%/3 h                           | S5           |
| BiVO <sub>4</sub> /WO <sub>3</sub>                             | Pt/C                                                                 | Tetracycline           | 0.09                                      | 0.15                   | 0.009                                      | 87%/8 h                           | S6           |
| Ag <sub>3</sub> PO <sub>4</sub> /C <sub>3</sub> N <sub>4</sub> | Cu <sub>2</sub> O                                                    | Tetracycline           | 0.09                                      | 0.36                   | 0.006                                      | 76%/4 h                           | S7           |
| NiFe/BiVO <sub>4</sub>                                         | Cu <sub>2</sub> O/Cu                                                 | Methyl blue            | 0.14                                      | 0.58                   | 0.02                                       | 81%/6 h                           | S8           |
| ZnO/Zn                                                         | CuO/Cu                                                               | Methyl green           | 0.23                                      | 0.95                   | 0.05                                       | 91%/6 h                           | S9           |
| WO <sub>3</sub> /W                                             | Pt                                                                   | Methyl orange          | 0.51                                      | 0.03                   | 0.003                                      | 70%/2 h                           | S10          |
| CuO                                                            | Cu/Co <sub>3</sub> S <sub>4</sub><br>/Ni <sub>3</sub> S <sub>2</sub> | Rifampicin             | 1.07                                      | 2.49                   | 0.50                                       | 93%/1.5 h                         | This<br>work |
| QDs/TiO <sub>2</sub> /WO <sub>3</sub> -                        |                                                                      | Tetracycline           | 1.03                                      | 2.42                   | 0.50                                       | 96%/1.5 h                         |              |
| BJS                                                            |                                                                      | Rhodamine B            | 0.98                                      | 2.28                   | 0.54                                       | 95%/1.5 h                         |              |

## Reference

[S1] L. Li, S. Chen, Y. Zhang, J. Li, J. Bai, T. Zhou, J. Wang, C. Zhou, L. Xia, Q. Xu, M. Rahim, B.

- Zhou, *Appl. Catal. B.*, 2020, 268, 118471.
- [S2] L. Xia, J. Bai, J. Li, Q. Zeng, X. Li, B. Zhou, *Appl. Catal. B.*, 2016, 183, 224–230.
- [S3] J. Li, J. Li, Q. Chen, J. Bai, B. Zhou, *J. Hazard. Mater.*, 2013, 262, 304–310.
- [S4] Q. Zeng, J. Bai, J. Li, L. Li, L. Xia, B. Zhou, Y. Sun, *Appl. Energy.*, 2018, 220, 127–137.
- [S5] M. Khalil, F. Naumi, U. Pratomo, T.A. Ivandini, G.T.M. Kadja, J.Y. Mulyana, *Appl. Surf. Sci.*, 2021, 542, 148746.
- [S6] S Xie, K yang, X Ye, *J. Colloid Interface Sci.*, 2018, 532, 758–766.
- [S7] H Yu, Y Xue, Y Lu, X Wang, S Zhu, W Qin, M Huo, *J. Environ. Manage.*, 2020, 254, 109738.
- [S8] Y He, C Zhang, J Hu, *Applied Energy.*, 2019, 255, 113770.
- [S9] M Kee, J Soo, S Lam, *J. Environ.Manage.*, 2018, 228, 383.
- [S10] D Pan, S Xiao, X Chen, R Li, Y Cao, D Zhang, S Pu, Z Li, G Li, H Li, *Environ. Sci. Technol.*, 2019, 53, 3697-3706.
